# Supplementary material
Source: Springer Nature journal article supplement (https://www.springermedizin.de/resource/supplementary/13063_2014_2177_MOESM1_ESM.pdf/9621556)

# Expected Total Sample Sizes as a function of possible drop-out rates

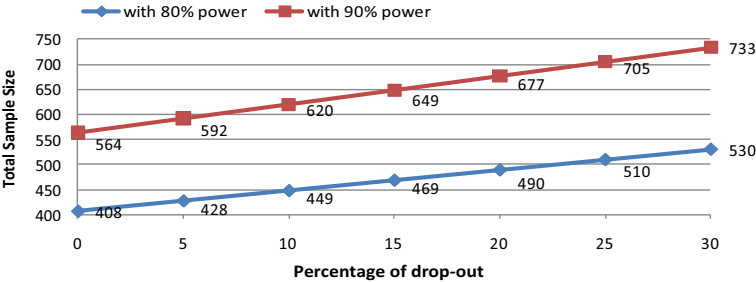

Supplement: MOESM1 [file 9621556]
